# Supplementary material for: Hydrothermal liquefaction integrated with wastewater treatment plants – life cycle assessment and technoeconomic analysis of process system options
Source: Royal Society of Chemistry journal article supplement (doi:10.1039/d3se01211e), 2024-01-01
Supplement: d3se01211e1.pdf [file d3se01211e1.pdf]

## Electronic Supplementary Information

Hydrothermal liquefaction integrated with wastewater treatment plants – Life cycle assessment and technoeconomic analysis of process system options

Paraskevi Karka,<sup>\*a,b</sup> Ib Johanssen<sup>c</sup> and Stavros Papadokonstantakis<sup>d</sup>

---

<sup>a</sup>Department of Space, Earth and Environment, Division of Energy Technology, Chalmers University of Technology, Hörsalsvägen 7B, 41296 Gothenburg, Sweden

<sup>b</sup>Engineering and Technology Institute Groningen (ENTEG), University of Groningen, Nijenborgh 4, Groningen, 9747 AG, The Netherlands

<sup>c</sup>Aarhus University, Department of Biological and Chemical Engineering, Høngøvej 2, 8200 Aarhus C, Denmark

<sup>d</sup>Institute of Chemical, Environmental and Bioscience Engineering, Vienna University of Technology (TU Wien), Getreidemarkt 9/166, 1060 Vienna, Austria

## Part 1: Inventories for Concept 1 and Concept 2

### Inventories for Concept 1, Scenarios 1a, 1b and 1c

Table A1 Life Cycle Inventory of HTL plant for Scenarios 1a, 1b and 1c

|                                              | Scenario 1a   |             | Scenario 1b |       | Scenario 1c |             |                                 |
|----------------------------------------------|---------------|-------------|-------------|-------|-------------|-------------|---------------------------------|
| <b>Output</b>                                |               |             |             |       |             |             |                                 |
| <b>Name</b>                                  | <b>Amount</b> | <b>Unit</b> |             |       |             | <b>Unit</b> | <b>Related process</b>          |
| Biocrude                                     | 1767          | Kg/hr       | 1767        | Kg/hr | 1767        | Kg/hr       | HTL biocrude production         |
| HTL Solids                                   | 2504          | kg/hr       | 2504        | kg/hr | 2504        | kg/hr       | HTL biocrude production         |
| Lime sludge                                  | 948           | kg/hr       | -           | -     | -           | -           | From HTL Aqueous treatment      |
| Exhaust                                      | 26815         | Kg/hr       | -           | -     | -           | -           | From HTL Aqueous treatment      |
| AD gas                                       | -             | -           | -           | -     | 416         | kg/hr       | From HTL AP treatment (AD unit) |
| Exhaust                                      | 5145          | kg/hr       | 5145        | kg/hr | 5145        | kg/hr       | From Combustion                 |
| Water recycle to headworks                   | 9588          | kg/hr       | -           | -     | -2242       | kg/hr       | From HTL AP treatment           |
| Aqueous phase from HTL recycled to headworks |               | kg/hr       | 11803       | kg/hr | 11803       | kg/hr       | From HTL Aqueous treatment      |
| AD residue                                   | -             | -           | -           | -     | 36          | kg/hr       | From HTL AP treatment (AD unit) |
| <b>Input</b>                                 |               |             |             |       |             |             |                                 |
| <b>Name</b>                                  | <b>Amount</b> | <b>Unit</b> |             |       |             |             | <b>Related process</b>          |
| Dewatered Sludge (25% solids)                | 16631         | kg/hr       | 16631       | kg/hr | 16631       | kg/hr       | HTL biocrude production         |
| Natural Gas                                  | 170           | kg/hr       | 170         | kg/hr | 0           | kg/hr       | Combustor                       |
| Air                                          | 4418          | kg/hr       | 4418        | kg/hr | 4418        | kg/hr       | Combustor                       |
| Lime                                         | 596           | kg/hr       | -           | -     | 0           | kg/hr       | HTL Aqueous treatment           |
| Natural Gas                                  | 79            | kg/hr       | -           | -     | -           | -           | HTL Aqueous treatment           |
| Air                                          | 26834         | kg/hr       | -           | -     | -           | -           | HTL Aqueous treatment           |

Power Consumption and Production (the same for Scenarios 1a, 1b & 1c)

|                   |      |                         |
|-------------------|------|-------------------------|
| Power consumption | Unit | Related process         |
| 122.4             | kW   | HTL biocrude production |

|      |    |                       |
|------|----|-----------------------|
| 38.0 | kW | Combustor             |
| 56.0 | kW | HTL Aqueous treatment |

Table A2 Life Cycle Inventory of central Upgrading Plant

| Output                     | Scenario 1a & 1b |       | Scenario 1c        |                                                        |                     |
|----------------------------|------------------|-------|--------------------|--------------------------------------------------------|---------------------|
| Name                       | Amount           | Unit  |                    | Unit                                                   | Related process     |
| Gasoline                   | 3238             | kg/hr | Gasoline           | 3238                                                   | Hydrotreatment      |
| Diesel                     | 10526            | kg/hr | Diesel             | 10526                                                  | Hydrotreatment      |
| Condensate to WWT          | 167              | kg/hr | Condensate to WWT  | 167                                                    | From Hydrogen       |
| Wastewater                 | 2345             | kg/hr | Wastewater         | 2345                                                   | from Hydrotreatment |
| Flue gas                   | 33082            | kg/hr | Flue gas           | 33082 (6530 biogenic and 1840 fossil CO <sub>2</sub> ) | Steam Reforming     |
| Wastewater to WWTP         | 7242             | Kg/hr | Wastewater to WWTP | 7242                                                   | Ammonia scrubber    |
| Input                      |                  |       |                    |                                                        |                     |
| Name                       | Amount           | Unit  |                    |                                                        | Related process     |
| Biocrude from HTL          | 17672            | kg/hr | 17672              | kg/hr                                                  | from HTL x10        |
| Air                        | 26404            | kg/hr | 26404              | kg/hr                                                  | Hydrogen production |
| Natural Gas                | 12507            | kg/hr | 256                | kg/hr                                                  | Hydrogen production |
| Water                      | 6945             | kg/hr | 6945               | kg/hr                                                  | Scrubber            |
| Cooling Tower Water Makeup | 10 652           | kg/hr | 10 652             | kg/hr                                                  | Steam System        |

Power Consumption and production (the same for Scenarios 1a, 1b & 1c)

| Power consumption | Unit | Related process |
|-------------------|------|-----------------|
| 1632.6            | kW   | Hydrotreatment  |
| 69.3              | kW   | Hydrocracking   |
| 1190.4            | kW   | Hydrogen plant  |
| Power production  | Unit | Related process |
| 1906.1            | kW   | Steam System    |

The net power consumption is refers to the needs of hydrogen plant. A priority of using the produced electricity on site is given to hydrotreatment and hydrocracking and the remaining electricity need is provided by the electricity network.

### Scenarios 2, 3 and 4

Table A3 Life Cycle Inventory of HTL plant

| Output                 | Scenario 2 & 3 | Scenario 4 |       |                              |
|------------------------|----------------|------------|-------|------------------------------|
| Name                   | Amount         |            | Unit  | Related process              |
| Biocrude               | 1767           | 1767       | Kg/hr | HTL biocrude production      |
| HTL Solids             | 2504           | 2504       | kg/hr | HTL biocrude production      |
| Exhaust                | 5145           | -          | kg/hr | From Combustion              |
| Aqueous phase from HTL | 11803          | 11803      | kg/hr | From HTL biocrude production |
| Input                  |                |            |       |                              |
| Name                   |                |            |       | Related process              |
| Dewatered              | 16631          | 16631      | kg/hr | HTL biocrude                 |

|                     |      |   |       |            |
|---------------------|------|---|-------|------------|
| Sludge (25% solids) |      |   |       | production |
| Natural Gas         | 170  | - | kg/hr | Combustor  |
| Air                 | 4418 | - | kg/hr | Combustor  |

#### Power Consumption

| Power consumption (Scenario 2 and 3) | Power consumption (Scenario 4) | Unit | Related process         |
|--------------------------------------|--------------------------------|------|-------------------------|
| 122.4                                | 1703                           | kW   | HTL biocrude production |
| 38.0                                 | -                              | kW   | Combustor               |

Table A4 Life Cycle Inventory of central Upgrading Plant for Scenarios 2,3 and 4

| Output                     |        |       |                     |
|----------------------------|--------|-------|---------------------|
| Name                       | Amount | Unit  | Related process     |
| Gasoline                   | 3238   | kg/hr | Hydrotreatment      |
| Diesel                     | 10526  | kg/hr | Hydrotreatment      |
| Wastewater                 | 2345   | kg/hr | from Hydrotreatment |
| Wastewater to WWTP         | 7242   | Kg/hr | Ammonia scrubber    |
| Input                      |        |       |                     |
| Name                       | Amount | Unit  | Related process     |
| Biocrude from HTL          | 17672  | kg/hr | from HTL x10        |
| Cooling Tower Water Makeup | 10 652 | kg/hr | Steam System        |
| Hydrogen                   | 958    | Kg/hr | Electrolysis unit   |
| Water                      | 6945   | kg/hr | Scrubber            |

#### Power Consumption

| Power consumption | Unit | Related process                                              |
|-------------------|------|--------------------------------------------------------------|
| 1632.6            | kW   | Hydrotreatment                                               |
| 69.3              | kW   | Hydrocracking                                                |
| 21,292            | kW   | Hydrogen plant (einaí oso katanalwnei to electrolysis plant) |
| Power production  | Unit | Related process                                              |
| 10,057~40%*27MW   | kW   | Steam System (from the combustion of offgas)                 |

## Concept 2

Table A5 Life Cycle Inventory of HTL plant

| Output                 |        |       |                              |
|------------------------|--------|-------|------------------------------|
| Name                   | Amount | Unit  | Related process              |
| Biocrude               | 1767   | Kg/hr | HTL biocrude production      |
| HTL Solids             | 2504   | kg/hr | HTL biocrude production      |
| Exhaust                | 5145   | kg/hr | From Combustion              |
| Aqueous phase from HTL | 11803  | kg/hr | From HTL biocrude production |
| Input                  |        |       |                              |

| <b>Name</b>                   |       |       | <b>Related process</b>  |
|-------------------------------|-------|-------|-------------------------|
| Dewatered Sludge (25% solids) | 16631 | kg/hr | HTL biocrude production |
| Natural Gas                   | 170   | kg/hr | Combustor               |
| Air                           | 4418  | kg/hr | Combustor               |

#### Power Consumption

| Power consumption | Unit | Related process         |
|-------------------|------|-------------------------|
| 122.4             | kW   | HTL biocrude production |
| 38.0              | kW   | Combustor               |

Table A6 Upgrading HDO decentralized plant

| <b>Output</b>         |               |             |                                                   |
|-----------------------|---------------|-------------|---------------------------------------------------|
| <b>Name</b>           | <b>Amount</b> | <b>Unit</b> | <b>Related process</b>                            |
| Hydrotreated biocrude | 1237          | kg/hr       | Hydrotreatment (70% conversion of biocrude)       |
| Wastewater            | 234.5         | kg/hr       | from Hydrotreatment                               |
| Wastewater to WWTP    | 724.2         | Kg/hr       | Ammonia scrubber                                  |
| <b>Input</b>          |               |             |                                                   |
| <b>Name</b>           | <b>Amount</b> | <b>Unit</b> | <b>Related process</b>                            |
| Biocrude from HTL     | 1767,2        | kg/hr       | from one HTL plant                                |
| Hydrogen              | 61.8          | Kg/hr       | Electrolysis unit (35gr/kg hydrotreated biocrude) |

#### Power Consumption

| Power consumption | Unit | Related process                                    |
|-------------------|------|----------------------------------------------------|
| 163.2             | kw   | Hydrotreatment                                     |
| 1374              | kW   | Hydrogen plant (Energy needs 61.8kg x 22kWh/kg H2) |
| Power production  | Unit | Related process                                    |
| 1090              | kW   | Steam System (from the combustion of offgas)       |

## Part 2: Cost data for Concepts 1 and 2

Table A7 Summarized cost data for Scenarios of Concept 1 for HTL production and upgrading level

|                                                                                                     | Scenario 1a      | Scenario 1b       | Scenario 1c        | Scenario 2        | Scenario 3        | Scenario 4       |
|-----------------------------------------------------------------------------------------------------|------------------|-------------------|--------------------|-------------------|-------------------|------------------|
| <b>GWP metric (kg CO<sub>2</sub>-eq/kg biocrude)/GWP metric (kg CO<sub>2</sub>-eq/MJ biocrude)/</b> | <b>1.39/0.09</b> | <b>0.72/0.020</b> | <b>0.073/0.002</b> | <b>0.72/0.020</b> | <b>0.72/0.020</b> | <b>0.31/0.01</b> |
| CAPEX-TIC (Eur/kW-bio crude)                                                                        | 910.3            | 755.3             | 816.9              | 755.3             | 755.3             | No detailed data |
| CAPEX-TCI (Eur/kW-biocrude)                                                                         | 1,811.69         | 1,551.19          | 1,654.72           | 1,551.19          | 1,551.19          | 1914             |
| Variable OPEX (Eur/MWh-bio crude)                                                                   | 9.63             | 8.40              | 2.36               | 8.40              | 8.40              | 11.30            |
| Total OPEX (Eur/MWh-biocrude)                                                                       | 24.54            | 20.41             | 14.66              | 20.41             | 20.41             | 23.3             |
| Total Production costs (TPC) (Eur/MWh-biocrude)                                                     | 54.61            | 46.16             | 42.13              | 46.16             | 46.16             | 55.04            |
| <b>GWP metric (kg CO<sub>2</sub>-eq/kg fuel blend)</b>                                              | <b>2.45/0.05</b> | <b>1.59/0.035</b> | <b>0.27</b>        | <b>1.55/0.034</b> | <b>1.46/0.030</b> | <b>0.91/0.02</b> |
| CAPEX-TIC (Eur/kW-fuel blend)                                                                       | 1,313.64         | 1,155.49          | 1,218.34           | 1,194.48          | 1,194.48          | No detailed data |
| CAPEX-TCI (Eur/kW-fuel blend)                                                                       | 2615.03          | 2349.35           | 2454.93            | 2440.25           | 2440.25           | 2,810            |
| Variable OPEX (Eur/MWh-fuel blend)                                                                  | 2.39             | 2.39              | 1.00               | 4.55              | 4.55              | 4.55             |
| Total OPEX (Eur/MWh-fuel blend)                                                                     | 32.23            | 28.06             | 21.96              | 29.54             | 29.54             | 32,42            |
| Total Production costs (TPC) (Eur/MWh-fuel blend)                                                   | 75.64            | 67.06             | 62.72              | 70.05             | 70.05             | 79.08            |

Table A8 CAPEX values for HTL biocrude production for scenarios 1a, 1b and 1c (for Scenario 2 and 3 capital costs are the same of Scenario 1b)

|                              |      |         |  |  |  |
|------------------------------|------|---------|--|--|--|
| <b>Plant Hours per year</b>  | 7920 |         |  |  |  |
| <b>Feed rate, dry sludge</b> | 110  | ton/day |  |  |  |

|                                                      |                         |                    |                    |                    |                                                                                                                                                      |
|------------------------------------------------------|-------------------------|--------------------|--------------------|--------------------|------------------------------------------------------------------------------------------------------------------------------------------------------|
| Feed rate, dry ash-free sludge                       | 93.5                    | ton/day            |                    |                    |                                                                                                                                                      |
| HTL biocrude production                              | 497.33                  | million MJ/yr      |                    |                    |                                                                                                                                                      |
|                                                      | 0.497                   | GJ/yr              |                    |                    |                                                                                                                                                      |
|                                                      | 13994.64                | tonnes/year        |                    |                    |                                                                                                                                                      |
|                                                      |                         | <b>Scenario 1a</b> | <b>Scenario 1b</b> | <b>Scenario 1c</b> | <b>Scenario 4</b>                                                                                                                                    |
| <b>CAPITAL COSTS</b>                                 | <b>US dollars(2014)</b> | <b>Euro 2018</b>   | <b>Euro 2018</b>   | <b>Euro 2018</b>   | <b>Euro 2018</b>                                                                                                                                     |
| Sludge Dewatering                                    | 1,400,000               | 1,103,607          | 1,103,607          | 1,103,607          | TCI was calculated based on a representative plant of ~2095kW and of a TCI of 3,700,000, that was scaled up linearly in the total capacity of 15 MW* |
| HTL Oil Production                                   | 13,100,000              | 10,326,609         | 10,326,609         | 10,326,609         |                                                                                                                                                      |
| HTL Water Recycle Treatment                          | 3,100,000               | 2,443,701          | -                  | € 971,148          |                                                                                                                                                      |
| Balance of Plant                                     | 600,000                 | 472,974            | 472,974            | 472,974            |                                                                                                                                                      |
| Total Installed Capital Cost (TIC)                   | <b>18,200,000</b>       | <b>14,346,892</b>  | <b>11,903,190</b>  | <b>12,874,338</b>  |                                                                                                                                                      |
| Building, site development, add'l piping (18.5% TIC) | 3,300,000               | 2,601,359          | 2,601,359          | 2,601,359          |                                                                                                                                                      |
| Total Direct Costs (TDC)                             | 21,500,000              | 16,948,251         | 14,504,550         | 15,475,698         |                                                                                                                                                      |
| Indirect Costs (60% TDC)                             | 12,900,000              | 10,168,951         | 8,702,730          | 9,285,419          |                                                                                                                                                      |
| Fixed Capital Investment (FCI=TDC+Indirect Cost)     | 34,400,000              | 27,117,200         | 23,207,280         | 24,761,116         |                                                                                                                                                      |
| Working Capital (5%FCI)                              | 1,700,000               | 1,355,860          | 1,160,364          | 1,238,056          |                                                                                                                                                      |
| Land (plant located at WWTP)                         | 100,000                 | 78,829             | 78,829             | 78,829             |                                                                                                                                                      |
| Total Capital Investment (TCI)                       | <b>36,200,000</b>       | <b>28,551,891</b>  | <b>24,446,473</b>  | <b>26,078,001</b>  | <b>30,766,588</b>                                                                                                                                    |
|                                                      |                         |                    |                    |                    |                                                                                                                                                      |
| Installed Capital per Annual MJ Biocrude (Euro/MJ)   |                         | 0.03               |                    |                    |                                                                                                                                                      |
| TCI per Annual MJ Biocrude (Euro/MJ)                 |                         | 0.06               |                    |                    |                                                                                                                                                      |
|                                                      |                         |                    |                    |                    |                                                                                                                                                      |
| Loan Rate                                            |                         | 8.00%              |                    |                    |                                                                                                                                                      |
| Term (years)                                         |                         | 10                 |                    |                    |                                                                                                                                                      |
| Capital Charge Factor                                |                         | 0.141              |                    |                    |                                                                                                                                                      |

\* Personal communication with <https://circlianordic.com/>

Table A9 Operating costs for HTL for Scenarios 1a, 1b, 1c and 4 (Scenario 2 and 3 have same operating with Scenario 1b)

| Variable                          | Value | Total Cost (2014), million USD/year | Million Euro (2014)/year | Million Euro (2018)/year | Million Euro (2018)/year | Million Euro (2018)/year | Million Euro (2018)/year |
|-----------------------------------|-------|-------------------------------------|--------------------------|--------------------------|--------------------------|--------------------------|--------------------------|
|                                   |       |                                     |                          | <b>Scenario 1a</b>       | <b>Scenario 1b</b>       | <b>Scenario 1c</b>       | <b>Scenario 4</b>        |
| <b>Sludge Dewatering</b>          |       |                                     |                          |                          |                          |                          |                          |
| Polymer, \$/lb (2013\$)           | 1.73  | 0.33                                | 0.24                     | 0.25                     | 0.25                     | 0.25                     | 0.25                     |
| <b>HTL Processing</b>             |       |                                     |                          |                          |                          |                          |                          |
| Natural Gas, \$/1000 scf (2014\$) | 5.62  | 0.39                                | 0.29                     | 0.29                     | 0.29                     | -                        |                          |
| Electricity, ¢/kWh (2014\$)       | 7.09  | 0.1                                 | 0.07                     | 0.07                     | 0.07                     | 0.07                     | 0.07                     |

|                                                             |                            |             |             |             |             |             |               |
|-------------------------------------------------------------|----------------------------|-------------|-------------|-------------|-------------|-------------|---------------|
| <b>HTL Aqueous Phase Treatment</b>                          |                            |             |             |             |             |             |               |
| Quicklime, \$/ton (2014\$)                                  | 107                        | 0.42        | 0.31        | 0.31        |             | -           |               |
| Natural gas (for THROX unit), \$/1000 scf (2014\$)          | 5.62                       | 0.18        | 0.13        | 0.13        |             | 0.01        |               |
|                                                             |                            |             |             |             | 0.28*       |             | 0.28*         |
| <b>Extra Aeration at WWTP</b>                               |                            |             |             |             |             |             |               |
| Electricity, kWh/lb COD removed (assuming 100% COD removal) | 0.4                        | 0.36        | 0.26        | 0.27        | 0.27        | 0.27        | 0.27          |
| <b>Total</b>                                                |                            | <b>1.78</b> | <b>1.30</b> | <b>1.33</b> | <b>1.16</b> | <b>0.60</b> | <b>0.87</b>   |
|                                                             |                            |             |             |             |             |             |               |
| Fixed operating costs                                       |                            | 0.81        | 0.59        | 0.60        | 0.60        | 0.60        | 0.60          |
| Overhead & maintenance                                      | 90% of labor & supervision | 0.73        | 0.53        | 0.54        | 0.54        | 0.54        | 0.54          |
| Maintenance capital                                         | 3% of TIC                  | 0.98        | 0.72        | 0.73        | 0.36        | 0.39        | 0.36          |
| Insurance and taxes                                         | 0.7% of FCI                | 0.24        | 0.18        | 0.18        | 0.16        | 0.17        | 0.16          |
| <b>Total Fixed Operating Costs</b>                          |                            | <b>2.76</b> | <b>2.02</b> | <b>2.06</b> | <b>1.66</b> | <b>1.70</b> | <b>1.66**</b> |

\*Average cost of treatment in a WWTP is considered, assuming 0.030Euro/kg of waste (Rerat et al., 2013) \*\*assumed the same to Scenario 1b as are preservative case due to lack of detailed data for Scenario 4

Table A10 CAPEX values for biocrude upgrading unit for all scenarios (Scenarios 1a, 1b and 1c have the same capital costs for the upgrading part)

| <b>Naphtha (million MJ/yr)</b> | <b>Diesel (million MJ/yr)</b> | <b>Total (million MJ/yr)</b> |                    |          |
|--------------------------------|-------------------------------|------------------------------|--------------------|----------|
| 1103.83                        | 3590.48                       | 4730.7                       |                    |          |
| 25645                          | tonnes /year                  | Gasoline                     |                    |          |
| 83366                          | tonnes /year                  | Diesel                       |                    |          |
|                                |                               | Scenarios 1a, 1b and 1c      | Scenario 2 and 3   | Comments |
| <b>CAPITAL COSTS</b>           | <b>US dollars (2014)</b>      | <b>Euro (2018)</b>           | <b>Euro (2018)</b> |          |
| <b>Hydrotreating</b>           | \$33,600,000                  | 26,486,569                   | 26,486,569         |          |
| <b>Hydrocracking</b>           | \$6,600,000                   | 5,202,719                    | 5,202,719          |          |



|                                                      |               |             |             |                                                                                                                                            |
|------------------------------------------------------|---------------|-------------|-------------|--------------------------------------------------------------------------------------------------------------------------------------------|
| Hydrogen Plant                                       | \$27,200,000  | 21,441,508  | 23,183,600  | In scenarios 2 & 3 steam reforming unit is replaced by electrolysis. An average value of 1000 Euro/Kw is given. Hydrogen produced is ~13MW |
| Steam cycle                                          | \$1,600,000   | 1,261,265   | 5,543,463   | The initial unit is scaled up from 1800kw to 10MW                                                                                          |
| Balance of Plant                                     | \$6,500,000   | 5,123,890   | 5,123,890   |                                                                                                                                            |
| Total Installed Capital Cost (TIC)                   | \$75,500,000  | 59,515,951  | 65,540,241  |                                                                                                                                            |
| Building, site development, add'l piping (18.5% TIC) | \$12,400,000  | 9,774,805   | 12,124,945  |                                                                                                                                            |
| Total Direct Costs (TDC)                             | \$87,900,000  | 69,290,756  | 77,665,185  |                                                                                                                                            |
| Indirect Costs (60% TDC)                             | \$52,800,000  | 41,621,752  | 46,599,111  |                                                                                                                                            |
| Fixed Capital Investment (FCI=TDC+Indirect Cost)     | \$140,700,000 | 110,912,508 | 124,264,296 |                                                                                                                                            |
| Working Capital (5%FCI)                              | \$7,000,000   | 5,518,035   | 6,213,215   |                                                                                                                                            |
| Land (included in feedstock cost)                    | \$2,700,000   | 2,128,385   | 2,128,385   |                                                                                                                                            |
| Total Capital Investment (TCI)                       | \$150,400,000 | 118,558,929 | 132,605,896 |                                                                                                                                            |
|                                                      |               |             |             |                                                                                                                                            |
| Loan Rate                                            | 8.00%         |             |             |                                                                                                                                            |
| Term (years)                                         | 10            |             |             |                                                                                                                                            |
| Capital Charge Factor (computed)                     | 0.168         |             |             |                                                                                                                                            |

Table A11 Operating costs for biocrude upgrading plant for all scenarios (Scenarios 1a, 1b and 1c have the same capital costs for the upgrading part)

| Variable                                                      | Value  | Total Cost (2014), million USD/year | Million Euro 2014 /year | Million Euro 2018/year |             |             |                  | Comments               |
|---------------------------------------------------------------|--------|-------------------------------------|-------------------------|------------------------|-------------|-------------|------------------|------------------------|
|                                                               |        |                                     |                         | Scenario 1a            | Scenario 1b | Scenario 1c | Scenarios 2, 3&4 |                        |
| Hydrotreating catalyst, \$/lb (2014\$) (2 year life)          | 16.6   | 0.4                                 | 0.29                    | 0.3                    | 0.3         | 0.3         | 0.3              | Assumed to be the same |
| Hydrocracking catalyst, \$/lb (2014\$) (5 year life)          | 16.6   | 0.03                                | 0.02                    | 0.02                   | 0.02        | 0.02        | 0.02             | Assumed to be the same |
| Hydrogen plant catalyst, \$/1000scf H2 (2014\$) (5 year life) | 0.0205 | 0.06                                | 0.04                    | 0.04                   | 0.04        | 0.04        | -                | No need of natural gas |

|                                        |                            |             |             |             |             |             |             |                                   |
|----------------------------------------|----------------------------|-------------|-------------|-------------|-------------|-------------|-------------|-----------------------------------|
| Natural gas, \$/1000scf (2014\$)       | 5.62                       | 2.79        | 2.04        | 2.08        | 2.08        | 0.45        | -           | No need of natural gas            |
| Cooling tower chemical, \$/lb (2007\$) | 1.36                       | 0.01        | 0.01        | 0.01        | 0.01        | 0.01        | 0.01        | Assumed to be the same            |
| Boiler chemical, \$/lb (2007\$)        | 2.27                       | 0.01        | 0.01        | 0.01        | 0.01        | 0.01        | 0.01        | Assumed to be the same            |
| Electricity, ¢/kWh (2014\$)            | 7.09                       | 0.92        | 0.67        | 0.69        | 0.69        | 0.04        | 5.73        | Electricity need is re-calculated |
| Water makeup, \$/ton (2001\$)          | 0.2                        | 0.05        | 0.04        | 0.04        | 0.04        | 0.04        | 0.04        | Assumed to be the same            |
| Wastewater fee, \$/ton (2001\$)        | 0.48                       | 0.07        | 0.05        | 0.05        | 0.05        | 0.05        | 0.05        | Assumed to be the same            |
| <b>Total</b>                           |                            | <b>4.34</b> | <b>3.17</b> | <b>3.24</b> | <b>3.24</b> | <b>1.36</b> | <b>6.16</b> |                                   |
| <b>Fixed operating costs</b>           |                            | 2.19        | 1.6         | 1.63        | 1.63        | 1.63        | 1.63        | Assumed to be the same            |
| <b>Overhead &amp; maintenance</b>      | 90% of labor & supervision | 1.97        | 1.44        | 1.47        | 1.47        | 1.47        | 1.47        | Assumed to be the same            |
| <b>Maintenance capital</b>             | 3% of TIC                  | 4.05        | 2.96        | 3.02        | 0.36        | 1.79        | 1.97        | Assumed to be the same            |
| <b>Insurance and taxes</b>             | 0.7% of FCI                | 0.99        | 0.72        | 0.74        | 0.16        | 0.78        | 0.87        | Assumed to be the same            |
| <b>Total Fixed Operating Costs</b>     |                            | <b>9.18</b> | <b>6.71</b> | <b>6.84</b> | <b>3.62</b> | <b>5.66</b> | <b>5.94</b> | <b>Assumed to be the same</b>     |

## Cost data for Concept 2

Table A12 Summarized cost data for Scenario 4 of Concept 2 for HTL production and upgrading level

|                                                                                                     | Concept 2         |
|-----------------------------------------------------------------------------------------------------|-------------------|
| <b>GWP metric (kg CO<sub>2</sub>-eq/kg biocrude)/GWP metric (kg CO<sub>2</sub>-eq/MJ biocrude)/</b> | <b>0.72/0.020</b> |
| CAPEX-TIC (Eur/kW-bio crude)                                                                        | 755.3             |
| CAPEX-TCI (Eur/kW-biocrude)                                                                         | 1,551.2           |
| Variable OPEX (Eur/MWh-bio crude)                                                                   | 8.4               |
| Total OPEX (Eur/MWh-biocrude)                                                                       | 20.4              |
| Total Production costs (TPC) (Eur/MWh-biocrude)                                                     | 46.2              |
| <b>GWP metric (kg CO<sub>2</sub>-eq/kg fuel blend)</b>                                              | <b>1.30/0.029</b> |

|                                                      |          |
|------------------------------------------------------|----------|
| CAPEX-TIC<br>(Eur/kW-fuel blend)                     | 1,226.01 |
| CAPEX-TCI<br>(Eur/kW-fuel blend)                     | 2,634.52 |
| Variable OPEX<br>(Eur/MWh-fuel blend)                | 1.88     |
| Total OPEX<br>(Eur/MWh-fuel blend)                   | 27.83    |
| Total Production costs (TPC)<br>(Eur/MWh-fuel blend) | 71.57    |

Table A13 CAPEX values for biocrude upgrading unit for Concept 2

|                                                      | Concept 1            |               | Concept 2   | Comments                                                                                                                                    |
|------------------------------------------------------|----------------------|---------------|-------------|---------------------------------------------------------------------------------------------------------------------------------------------|
| CAPITAL COSTS                                        | US dollars<br>(2014) | Euro (2018)   | Euro (2018) |                                                                                                                                             |
| Hydrotreating                                        | \$33,600,000         | 26,486,569    | 3,735,884   | Scaled-down based on the reference report Snowden 2019                                                                                      |
| Hydrocracking                                        | \$6,600,000          | 5,202,719     | -           | It is not used in this concept                                                                                                              |
| Hydrogen Plant                                       | \$27,200,000         | 21,441,508    | 1,496,818   | In scenarios 1 and 2 steam reforming unit is replaced by electrolysis. An average value of 1000 Euro/Kw is given. Hydrogen produced is 2 MW |
| Steam cycle                                          | \$1,600,000          | 1,261,265     | 843,203     | The initial unit is scaled up from 1800kw to 10MW                                                                                           |
| Balance of Plant                                     | \$6,500,000          | 5,123,890     | 600,914     | 9% of TIC based on reference                                                                                                                |
| Total Installed Capital Cost (TIC)                   | \$75,500,000         | 59,515,951    | 6,676,819   |                                                                                                                                             |
| Building, site development, add'l piping (18.5% TIC) | \$12,400,000         | 9,774,805     | 1,235,211   |                                                                                                                                             |
| Total Direct Costs (TDC)                             | \$87,900,000         | \$69,290,756  | 7,912,030   |                                                                                                                                             |
| Indirect Costs (60% TDC)                             | \$52,800,000         | 41,621,752    | 4,747,218   |                                                                                                                                             |
| Fixed Capital Investment (FCI=TDC+Indirect Cost)     | \$140,700,000        | \$110,912,508 | 12,659,248  |                                                                                                                                             |
| Working Capital (5%FCI)                              | \$7,000,000          | 5,518,035     | 632,962     |                                                                                                                                             |
| Land (included in feedstock cost)                    | \$2,700,000          | 2,128,385     | 2,128,385   |                                                                                                                                             |
| Total Capital Investment (TCI)                       | \$150,400,000        | 118,558,929   | 15,420,596  |                                                                                                                                             |

Table A14 Operating costs for biocrude upgrading plant for Concept 2

| Variable                                  | Value | Total Cost (2014), million USD/year | Million Euro 2014 /year | Million Euro 2018/year | 1/10th of the original capacity presented in the study of Snowden Swan et al. 2017 | Comments               |
|-------------------------------------------|-------|-------------------------------------|-------------------------|------------------------|------------------------------------------------------------------------------------|------------------------|
| Hydrotreating catalyst, \$/lb (2014\$) (2 | 16.6  | 0.4                                 | 0.29                    | 0.3                    | 0.03                                                                               | Assumed to be the same |

|                                                               |                            |             |             |             |             |                                   |
|---------------------------------------------------------------|----------------------------|-------------|-------------|-------------|-------------|-----------------------------------|
| year life)                                                    |                            |             |             |             |             |                                   |
| Hydrocracking catalyst, \$/lb (2014\$) (5 year life)          | 16.6                       | 0.03        | 0.02        | 0.02        | 0.002       | Assumed to be the same            |
| Hydrogen plant catalyst, \$/1000scf H2 (2014\$) (5 year life) | 0.0205                     | 0.06        | 0.04        | 0.04        | -           | No need of natural gas            |
| Natural gas, \$/1000scf (2014\$)                              | 5.62                       | 2.79        | 2.04        | 2.08        | -           | No need of natural gas            |
| Cooling tower chemical, \$/lb (2007\$)                        | 1.36                       | 0.01        | 0.01        | 0.01        | 0.001       | Assumed to be the same            |
| Boiler chemical, \$/lb (2007\$)                               | 2.27                       | 0.01        | 0.01        | 0.01        | 0.001       | Assumed to be the same            |
| Electricity, ¢/kWh (2014\$)                                   | 7.09                       | 0.92        | 0.67        | 0.69        | 0.20        | Electricity need is re-calculated |
| Water makeup, \$/ton (2001\$)                                 | 0.2                        | 0.05        | 0.04        | 0.04        | 0.004       | Assumed to be the same            |
| Wastewater fee, \$/ton (2001\$)                               | 0.48                       | 0.07        | 0.05        | 0.05        | 0.005       | Assumed to be the same            |
| <b>Total</b>                                                  |                            | <b>4.34</b> | <b>3.17</b> | <b>3.24</b> | <b>0.24</b> |                                   |
|                                                               |                            |             |             |             |             |                                   |
| <b>Fixed operating costs</b>                                  |                            | 2.19        | 1.6         | 1.63        | 0.16        | Assumed to be the same            |
| <b>Overhead &amp; maintenance</b>                             | 90% of labor & supervision | 1.97        | 1.44        | 1.47        | 0.15        | Assumed to be the same            |
| <b>Maintenance capital</b>                                    | 3% of TIC                  | 4.05        | 2.96        | 3.02        | 0.30        | Assumed to be the same            |
| <b>Insurance and taxes</b>                                    | 0.7% of FCI                | 0.99        | 0.72        | 0.74        | 0.07        | Assumed to be the same            |
| <b>Total Fixed Operating Costs</b>                            |                            | 9.18        | 6.71        | 6.84        | 0.69        | Assumed to be the same            |

## Part 3: LCA data

Table A15 LCA factors (source Ecoinvent database, <https://ecoinvent.org/>)

| Upstream processes(Ecoinvent)                                                                                                                                                                                                                                                                     | GWP100 (kg CO2-Eq/kg of product) |
|---------------------------------------------------------------------------------------------------------------------------------------------------------------------------------------------------------------------------------------------------------------------------------------------------|----------------------------------|
| market for natural gas, from high pressure network (1-5 bar), at service station, GLO,                                                                                                                                                                                                            | 0.61                             |
| market for natural gas, high pressure, RoW m3                                                                                                                                                                                                                                                     | 0.26                             |
| market for tap water, Europe without Switzerland (kg)                                                                                                                                                                                                                                             | 2.00E-5                          |
| water production, deionised, Europe without Switzerland (kg)                                                                                                                                                                                                                                      | 2.86E-04                         |
| market for water, deionised, Europe without Switzerland                                                                                                                                                                                                                                           | 2.86E-04                         |
| market group for electricity, medium voltage, RER kwh                                                                                                                                                                                                                                             | 0.40                             |
| market for electricity, medium voltage, DK                                                                                                                                                                                                                                                        | 0.24                             |
| market for process-specific burdens, residual material landfill Europe without Switzerland (kg)                                                                                                                                                                                                   | 0.003                            |
| process-specific burdens, inert material landfill, RoW kg                                                                                                                                                                                                                                         | 0.003                            |
| treatment of wastewater, average, capacity 1.1E10l/year<br>Wastewater purified in a moderately large municipal wastewater treatment plant (capacity class 2), with an average capacity size of 71100 per-capita-equivalents PCE, treatment of wastewater, average, capacity 1.1E10l/year, CH (m3) | 0.327                            |
| market for wastewater, average, Europe without Switzerland/The wastewater, average is treated in the same place as it is produced. That is why regional market activities are in this case adequate (m3)                                                                                          | 0.476                            |
| hydrogen cracking, APME, RER (kg)/ hydrogen liquid                                                                                                                                                                                                                                                | 1.69                             |
| chlor-alkali electrolysis, diaphragm cell, RER kg/ hydrogen liquid                                                                                                                                                                                                                                | 12.45                            |
| hydrogen production, gaseous, petroleum refinery operation Europe without Switzerland                                                                                                                                                                                                             | 1.55                             |
| glycerine production, from epichlorohydrin, RER                                                                                                                                                                                                                                                   | 4.04                             |
| market for potassium carbonate                                                                                                                                                                                                                                                                    | 2.66                             |
| quicklime production, milled, loose, RoW                                                                                                                                                                                                                                                          | 1.17                             |
| chlor-alkali electrolysis, mercury cel RER                                                                                                                                                                                                                                                        | 3.49                             |
| chemical production, organic GLO chemical, organic [kg]                                                                                                                                                                                                                                           | 1.93                             |
| treatment, sewage, to wastewater treatment, class 2, CH, [m3] (#2276)                                                                                                                                                                                                                             | 0.35                             |

The assumptions used on LCA are the following:

- All output streams crossing the system boundaries of the presented cases should have been characterized for their destiny either directed to another treatment facility or to the environment.
- The Aqueous Phase (AP) produced by the HTL reaction stage is either sent directly to a central waste treatment facility under the assumption that there is no need of ammonia removal (Scenario 1b) or treated via ammonia stripping and the resulting wastewater stream is sent again to a central WWTP (Scenario 1a) or sent to an AD plant (Scenario 1c) the wastewater of which is

also sent to a WWTP (Scenario 1c). All other wastewater streams are assumed to be sent to a central WWTP.

- The WWTP can be the plant that supplies the sludge to the whole study system (i.e. the boundaries) and therefore the produced wastewater streams are assumed to be burdened by the treatment impacts of the WWTP without however affecting the produced amount of sludge. The design of the WWTP is not considered as part of the environmental and technoeconomic analysis of the particular study therefore a process model “Wastewater, average {CH} treatment of, capacity 1.1E10l/year | APOS, U” was used in order to attribute treatment emissions.
- In addition, the sewage sludge comes to the entrance to the boundaries with no impacts allocated from the wastewater plant model. “Wastewater, average {CH} treatment of, capacity 1.1E10l/year | APOS, U” was used in order to attribute treatment emissions”
- Ecoinvent considers the sludge biogenic according to the model assumption. “Wastewater, average {CH} treatment of, capacity 1.1E10l/year | APOS, U” was used in order to attribute treatment emissions”
- We assume that the returned wastewaters to the WWTP is of very low quantity compared to the treated wastewaters without any operational impact to the plant.
- Waste models from Ecoinvent are not sensitive to the quality but only to the quantity.
- The benefits of sludge incineration as considered in the Ecoinvent model are not considered in the case study.
- The AD technology performance has been obtained from the study of Tews et al., (2014) which considers that the input stream to the AD unit includes 25% organics after dewatering of the initial stream that has 4% organics. The dewatering process reduces the initial water content by 90%. This reduction percentage has been considered for the current study assuming that the initial stream (11800kg/hr) exiting the HTL unit contains 75% organics which after reducing the water content by 90% reaches a content of 45% to organics (final weight 1851kg/hr). This stream is considered to be converted (by %wt). to gas by (23%), wastewater (76%) and solids (1%). The estimated gas quantity is then multiplied by a factor of 62% representing the content of biogas in methane (<https://www.iea.org/reports/outlook-for-biogas-and-biomethane-prospects-for-organic-growth/an-introduction-to-biogas-and-biomethane>)
- The impacts of the process that does the dewatering has not taken into account in the calculations of the current study neither in the study of Tews et al (2014).
- Some parameters like to efficiency of the AD plant to gas might be subjected to sensitivity analysis given that the streams of the reference study are not of the same composition to the current study but this is out of scope.
- The separation of the gas stream into pure methane that the is used internally in the HTL process and to hydrogen production in Scenario 1c has not taken into account

#### **Assumptions for system boundaries**

- System boundaries start from the entrance of sewage sludge until the biofuels (diesel, gasoline or HDO biocrude), assuming that feedstock enters boundaries with no impacts allocated from the wastewater plant model. The Life Cycle Assessment is on cradle to gate analysis expressed on 1 kg of biofuel as a functional unit.
- A cradle to grave approach is done for the GWP indicator which is expressed on the whole life cycle of the fuel blend (diesel and gasoline) considering as

avoided impacts the fossil based fuels production plus the fossil emissions from combustion.

- Transportation is not included in the calculations and any kind of logistics-related impacts, i.e transporting sludge to HTL and the biocrude to the upgrading unit.
- The sizing of each HTL plant is assumed to be of such capacity so as to be coupled with a WWTP from which it is supplied with sewage sludge and therefore corresponds to the population equivalent that the WWTP covers. The same goes for the sizing of the central hydrogen upgrading plant that receives input from 10 different HTL plants. The selected WWTP plant size in this study roughly corresponds to a population equivalent of 2-4 millions, which for example represents big WWTP from a European perspective. Thus, considering one HTL plant for each WWTP and one upgrading plant serving 10 such HTL/WWTP plants already refers to a very high scale, making further scaling-up scenarios rather improbable. Scaling down would be more likely and this would affect linearly the LCA impacts, which will not be the case for technoeconomic analysis. On the other hand, ramping-up the technology (i.e., installing more plants of the same size in various locations worldwide) would affect both LCA and TEA by improving efficiencies, decreasing installation and productions costs according to the learning by doing concept. However, this type of prospective analysis lies outside the scope of the present study.
- Hydrogen that is needed for upgrading is 958kg/hr that corresponds to 33MW (using LHV equal to 33 kWh/kg (Fuels - Higher and Lower Calorific Values (engineeringtoolbox.com))). It is assumed that this quantity is covered by electrolysis technology without estimating the number of plants of a particular size needed to cover this requirement. For example (Selma Brynolf 2018), gives the size of alkaline electrolysis 1.1-5.3MW and PEM -0.2-2.3.

Values of impacts for Hydrotreating and Hydrocracking for Scenarios presented in Figures 8 and 9

|             | <b>GWP (kg CO<sub>2</sub>-eq/kg biofuel blend</b> |                          |
|-------------|---------------------------------------------------|--------------------------|
|             | Hydrotreating &                                   | Hydrocracking (Scrubber) |
| Scenario 1b | 5.7E-05                                           | 3.3E-04                  |
| Scenario 1c | 5.7E-05                                           | 3.3E-04                  |
| Scenario 2  | 5.7E-05                                           | -                        |
| Scenario 3  | 5.7E-05                                           | -                        |
| Scenario 4  | 5.7E-05                                           |                          |
